# Supplementary material for: Autophagy and inflammation in ischemic stroke
Source: PubMed Central journal article supplement — Neural Regen Res. 2020 Jan 28;15(8):1388–96. doi: 10.4103/1673-5374.274331 (PMC7059569; doi:10.4103/1673-5374.274331), 2020-01-28
Supplement: NRR-15-1388_Suppl1.pdf [file NRR-15-1388_Suppl1.pdf]

## OPEN PEER REVIEW REPORT 1

**Name of journal:** Neural Regeneration Research

**Manuscript NO:** NRR-D-19-00536

**Title:** Autophagy and inflammation in cerebral ischemia

**Reviewer's Name:** Sagar Gaikwad

**Reviewer's country:** USA

**Date sent for review:** 2019-09-17

### COMMENTS TO AUTHORS

This review article on "Autophagy and inflammation in cerebral ischemia" is very interesting, it addresses current advances in the field. It describes fundamental physiological mechanisms "autophagy" and "inflammation" and their cross-talk during the brain injuries. A clear understanding of these regulatory mechanisms could provide therapeutic treatments for ischemic stroke.

The article is well-organized and correctly written, except for some punctual mistakes. In my opinion, the authors should develop a little more concept about the regulation of inflammasome during the brain injury, and its involvement in inflammation and repair process. Authors should 'briefly' discuss the following articles:

- \* Walsh et al., Nat Rev Neurosci. 2014 "Inflammasomes in the CNS"
- \* Gaikwad et al., Cell Mol Neurobiol. 2017 "CD40 Negatively Regulates ATP-TLR4-Activated Inflammasome in Microglia"
